# Supplementary material
Source: PubMed Central journal article supplement (PMC10431404)
Supplement: as9-4-e237-s001.pdf [file as9-4-e237-s001.pdf]

## **Supplemental Digital Content (SDC)**

**SDC-Table 1.** Patient Characteristics and Outcomes by Clinical Site

**SDC-Table 2.** Patient Characteristics and Clinical Outcomes of Private and Uninsured Insurance Type Patients

**SDC-Table 3.** EDOS and Readmissions (30-day) Components of Textbook Outcomes Adjusted for Reoperations and CDIV Complications

**SDC-Figure 1.** Case Status, Textbook Outcomes (TO) and TO Components with a Sensitivity Analysis also Adjusting for Age

**SDC-Table 1. Patient Characteristics and Outcomes by Clinical Site<sup>a</sup>**

|                                                           | <b>Overall</b> | <b>High-burden</b> | <b>Medium-burden</b> | <b>Low-burden</b> | <b>p-value</b>  |
|-----------------------------------------------------------|----------------|--------------------|----------------------|-------------------|-----------------|
| <b>Number (%)<sup>b</sup></b>                             | 34,251         | 6,225 (18.2)       | 8,991 (26.3)         | 19,035 (55.6)     |                 |
| <b>Age (mean (SD))</b>                                    | 58.34 (15.98)  | 52.18 (14.67)      | 56.44 (16.24)        | 61.25 (15.55)     | <b>&lt;.001</b> |
| <b>Sex (Female)</b>                                       | 18,760 (54.8)  | 3,299 (53.0)       | 5,460 (60.7)         | 10,001 (52.5)     | <b>&lt;.001</b> |
| <b>Race/Ethnicity</b>                                     |                |                    |                      |                   | <b>&lt;.001</b> |
| Black, non-Hispanic                                       | 3,982 (11.6)   | 386 (6.2)          | 1,986 (22.1)         | 1,610 (8.5)       |                 |
| Hispanic, any race                                        | 4,816 (14.1)   | 4,210 (67.6)       | 463 (5.1)            | 143 (0.8)         |                 |
| Multiracial, non-Hispanic                                 | 573 (1.7)      | 110 (1.8)          | 310 (3.4)            | 153 (0.8)         |                 |
| White, non-Hispanic                                       | 24,880 (72.6)  | 1,519 (24.4)       | 6,232 (69.3)         | 17,129 (90.0)     |                 |
| <b>RAI</b>                                                |                |                    |                      |                   | <b>&lt;.001</b> |
| Robust (≤20)                                              | 18,571 (54.2)  | 4,126 (66.3)       | 5,545 (61.7)         | 8,900 (46.8)      |                 |
| Normal (21-29)                                            | 11,593 (33.8)  | 1,497 (24.0)       | 2,564 (28.5)         | 7,532 (39.6)      |                 |
| Frail (30-39)                                             | 3,657 (10.7)   | 489 (7.9)          | 798 (8.9)            | 2,370 (12.5)      |                 |
| Very Frail (≥40)                                          | 430 (1.3)      | 113 (1.8)          | 84 (0.9)             | 233 (1.2)         |                 |
| <b>ADI&gt;85 (highly deprived)</b>                        | 7,408 (21.6)   | 2,223 (35.7)       | 1,207 (13.4)         | 3,978 (20.9)      | <b>&lt;.001</b> |
| <b>Insurance</b>                                          |                |                    |                      |                   | <b>&lt;.001</b> |
| Private                                                   | 13,546 (39.5)  | 1,446 (23.2)       | 3,802 (42.3)         | 8,298 (43.6)      |                 |
| Medicare                                                  | 14,907 (43.5)  | 1,603 (25.8)       | 3,519 (39.1)         | 9,785 (51.4)      |                 |
| Medicaid                                                  | 2,826 (8.3)    | 967 (15.5)         | 1,047 (11.6)         | 812 (4.3)         |                 |
| Uninsured                                                 | 2,972 (8.7)    | 2,209 (35.5)       | 623 (6.9)            | 140 (0.7)         |                 |
| <b>Case Status</b>                                        |                |                    |                      |                   | <b>&lt;.001</b> |
| Elective                                                  | 22,871 (66.8)  | 2,749 (44.2)       | 7,670 (85.3)         | 12,452 (65.4)     |                 |
| Urgent                                                    | 7,762 (22.7)   | 2,763 (44.4)       | 959 (10.7)           | 4040 (21.2)       |                 |
| Emergent                                                  | 3,618 (10.6)   | 713 (11.5)         | 362 (4.0)            | 2,543 (13.4)      |                 |
| <b>Expanded OSS (surgical-induced physiologic stress)</b> |                |                    |                      |                   | <b>&lt;.001</b> |
| OSS1 (very low)                                           | 339 (1.0)      | 144 (2.3)          | 70 (0.8)             | 125 (0.7)         |                 |
| OSS2 (low)                                                | 7,050 (20.6)   | 1,521 (24.4)       | 1,996 (22.2)         | 3,533 (18.6)      |                 |
| OSS3 (moderate)                                           | 19,611 (57.3)  | 3,355 (53.9)       | 5,667 (63.0)         | 10,589 (55.6)     |                 |
| OSS4 (high)                                               | 6,197 (18.1)   | 1,044 (16.8)       | 1,146 (12.7)         | 4,007 (21.1)      |                 |
| OSS5 (very high)                                          | 1,054 (3.1)    | 161 (2.6)          | 112 (1.2)            | 781 (4.1)         |                 |
| <b>30-day Complications<sup>c</sup></b>                   |                |                    |                      |                   |                 |
| Reoperation                                               | 2,090 (6.1)    | 472 (7.6)          | 375 (4.2)            | 1,243 (6.5)       | <b>&lt;.001</b> |
| CDIV                                                      | 1,783 (5.2)    | 506 (8.1)          | 231 (2.6)            | 1,046 (5.5)       | <b>&lt;.001</b> |
| Mortality                                                 | 747 (2.2)      | 134 (2.2)          | 88 (1.0)             | 525 (2.8)         | <b>&lt;.001</b> |
| <b>30-day EDOS<sup>d</sup></b>                            | 1,914 (5.6)    | 747 (12.0)         | 465 (5.2)            | 702 (3.7)         | <b>&lt;.001</b> |
| <b>30-day Readmission<sup>d</sup></b>                     | 1,628 (4.8)    | 925 (14.9)         | 419 (4.7)            | 284 (1.5)         | <b>&lt;.001</b> |
| <b>Textbook Outcomes</b>                                  | 28,015 (81.8)  | 4,229 (67.9)       | 7,674 (85.4)         | 16,112 (84.6)     | <b>&lt;.001</b> |

Abbreviations: ADI, Area Deprivation Index; CDIV, Clavien-Dindo Level IV; EDOS, Emergency Department visits/Observation Stays; OSS, Operative Stress Score; RAI, Risk Analysis Index; SD, Standard Deviation

<sup>a</sup>Burden level categorized based upon the proportion of uninsured patients at each clinical site

<sup>b</sup>Percent calculation by row, the rest of the percent calculations were by column

<sup>c</sup>Complications defined as 30 days from date of the index surgery

<sup>d</sup>EDOS and Readmissions defined as 30 days from date of hospital discharge of the index surgery; EDOS and Readmissions were evaluated independently; membership in one group does not exclude a case from membership in the other

**SDC-Table 2. Patient Characteristics and Clinical Outcomes of Private and Uninsured Insurance Type Patients**

|                                                           | Overall       | Private       | Uninsured     | p-value         |
|-----------------------------------------------------------|---------------|---------------|---------------|-----------------|
| <b>Number (%)<sup>a</sup></b>                             | 16,518        | 13,546 (82.0) | 2,972 (18.0)  |                 |
| <b>Age (mean (SD))</b>                                    | 49.81 (12.61) | 50.39 (12.59) | 47.20 (12.39) | <b>&lt;.001</b> |
| <b>Sex (Female)</b>                                       | 9,506 (57.5)  | 7,991 (59.0)  | 1,515 (51.0)  | <b>&lt;.001</b> |
| <b>Race/Ethnicity</b>                                     |               |               |               | <b>&lt;.001</b> |
| Black, non-Hispanic                                       | 1,692 (10.2)  | 1,429 (10.5)  | 263 (8.8)     |                 |
| Hispanic, any race                                        | 2,894 (17.5)  | 1,012 (7.5)   | 1,882 (63.3)  |                 |
| Multiracial, non-Hispanic                                 | 351 (2.1)     | 277 (2.0)     | 74 (2.5)      |                 |
| White, non-Hispanic                                       | 11,581 (70.1) | 10,828 (79.9) | 753 (25.3)    |                 |
| <b>RAI</b>                                                |               |               |               | <b>&lt;.001</b> |
| Robust (≤20)                                              | 13,020 (78.8) | 10,509 (77.6) | 2,511 (84.5)  |                 |
| Normal (21-29)                                            | 2,508 (15.2)  | 2,159 (15.9)  | 349 (11.7)    |                 |
| Frail (30-39)                                             | 932 (5.6)     | 842 (6.2)     | 90 (3.0)      |                 |
| Very Frail (≥40)                                          | 58 (0.4)      | 36 (0.3)      | 22 (0.7)      |                 |
| <b>ADI &gt;85 (highly deprived)</b>                       | 3,293 (19.9)  | 2,190 (16.2)  | 1,103 (37.1)  | <b>&lt;.001</b> |
| <b>Clinical Sites<sup>b</sup></b>                         |               |               |               | <b>&lt;.001</b> |
| High-burden                                               | 3,655 (22.1)  | 1,446 (10.7)  | 2,209 (74.3)  |                 |
| Medium-burden                                             | 4,425 (26.8)  | 3,802 (28.1)  | 623 (21.0)    |                 |
| Low-burden                                                | 8,438 (51.1)  | 8,298 (61.3)  | 140 (4.7)     |                 |
| <b>Case Status</b>                                        |               |               |               | <b>&lt;.001</b> |
| Elective                                                  | 11,688 (70.8) | 10,389 (76.7) | 1,299 (43.7)  |                 |
| Urgent                                                    | 3,361 (20.3)  | 2,071 (15.3)  | 1,290 (43.4)  |                 |
| Emergent                                                  | 1,469 (8.9)   | 1,086 (8.0)   | 383 (12.9)    |                 |
| <b>Expanded OSS (surgical-induced physiologic stress)</b> |               |               |               | <b>&lt;.001</b> |
| OSS1 (very low)                                           | 181 (1.1)     | 107 (0.8)     | 74 (2.5)      |                 |
| OSS2 (low)                                                | 3,627 (22.0)  | 2,760 (20.4)  | 867 (29.2)    |                 |
| OSS3 (moderate)                                           | 9,583 (58.0)  | 7,985 (58.9)  | 1,598 (53.8)  |                 |
| OSS4 (high)                                               | 2,773 (16.8)  | 2,373 (17.5)  | 400 (13.5)    |                 |
| OSS5 (very high)                                          | 354 (2.1)     | 321 (2.4)     | 33 (1.1)      |                 |
| <b>30-day Complications<sup>c</sup></b>                   |               |               |               |                 |
| Reoperation                                               | 837 (5.1)     | 658 (4.9)     | 179 (6.0)     | <b>.010</b>     |
| CDIV                                                      | 499 (3.0)     | 372 (2.7)     | 127 (4.3)     | <b>&lt;.001</b> |
| Mortality                                                 | 146 (0.9)     | 125 (0.9)     | 21 (0.7)      | .302            |
| <b>30-day EDOS<sup>d</sup></b>                            | 928 (5.6)     | 580 (4.3)     | 348 (11.7)    | <b>&lt;.001</b> |
| <b>30-day Readmissions<sup>d</sup></b>                    | 741 (4.5)     | 406 (3.0)     | 335 (11.3)    | <b>&lt;.001</b> |
| <b>Textbook Outcomes</b>                                  | 14,020 (84.9) | 11,815 (87.2) | 2,205 (74.2)  | <b>&lt;.001</b> |

Abbreviations: ADI, Area Deprivation Index (>85 defined as highly deprived); CDIV, Clavien-Dindo Level IV; EDOS, Emergency Department visits/Observation Stays; OSS, Operative Stress Score; RAI, Risk Analysis Index; SD, Standard Deviation

<sup>a</sup>Percent calculation by row, the rest of the percent calculations were by column

<sup>b</sup>Burden level categorized based upon the proportion of uninsured patients at each clinical site

<sup>c</sup>Complications defined as 30 days from date of the index surgery

<sup>d</sup>EDOS and Readmissions defined as 30 days from date of hospital discharge of the index surgery; EDOS and Readmissions were evaluated independently; membership in one group does not exclude a case from membership in the other

**SDC-Table 3. EDOS and Readmissions (30-day<sup>a</sup>) Components of Textbook Outcomes Adjusted for Race, Frailty<sup>b</sup>, Operative Stress<sup>c</sup>, Area Deprivation Index, Insurance Type, Reoperations and CDIV Complications**

| Predictors                                        | EDOS  |               |                 | Readmissions |               |                 |
|---------------------------------------------------|-------|---------------|-----------------|--------------|---------------|-----------------|
|                                                   | aOR   | CI            | p-value         | aOR          | CI            | p-value         |
| <b>Race/Ethnicity (Ref = White, non-Hispanic)</b> |       |               |                 |              |               |                 |
| Black, non-Hispanic                               | 1.153 | 0.987 – 1.346 | .072            | 1.001        | 0.836 – 1.198 | .991            |
| Hispanic, any race                                | 1.250 | 1.060 – 1.474 | <b>.008</b>     | 1.002        | 0.854 – 1.174 | .985            |
| Multiracial, non-Hispanic                         | 1.147 | 0.812 – 1.620 | .436            | 1.289        | 0.911 – 1.825 | .152            |
| <b>ADI &gt;85 (Ref = ADI ≤85)</b>                 | 1.012 | 0.904 – 1.133 | .837            | 0.934        | 0.823 – 1.061 | .297            |
| <b>Insurance (Ref = Private)</b>                  |       |               |                 |              |               |                 |
| Medicare                                          | 1.221 | 1.073 – 1.388 | <b>.002</b>     | 1.245        | 1.074 – 1.444 | <b>.004</b>     |
| Medicaid                                          | 1.671 | 1.423 – 1.963 | <b>&lt;.001</b> | 1.629        | 1.365 – 1.944 | <b>&lt;.001</b> |
| Uninsured                                         | 1.524 | 1.295 – 1.793 | <b>&lt;.001</b> | 1.258        | 1.059 – 1.495 | <b>.009</b>     |
| <b>Urgent/Emergent (Ref = Elective)</b>           | 0.995 | 0.894 – 1.107 | .928            | 1.127        | 1.000 – 1.270 | <b>.050</b>     |
| <b>30-day Complications<sup>d</sup></b>           |       |               |                 |              |               |                 |
| Reoperations                                      | 1.634 | 1.384 – 1.928 | <b>&lt;.001</b> | 4.634        | 4.004 – 5.361 | <b>&lt;.001</b> |
| CDIV                                              | 0.962 | 0.788 – 1.176 | .708            | 1.384        | 1.153 – 1.661 | <b>&lt;.001</b> |

Abbreviations: ADI, Area Deprivation Index (>85 defined as highly deprived); aOR, Adjusted Odds Ratio; CI, 95% Confidence Interval; EDOS, Emergency Department visits/Observation Stays; OSS, Operative Stress Score; RAI, Risk Analysis Index; Ref, Reference Value

<sup>a</sup>EDOS and Readmissions defined as 30 days from date of hospital discharge of the index surgery

<sup>b</sup>Adjustments for frailty by the Risk Analysis Index (RAI) not shown

<sup>c</sup>Adjustments for operative stress by the expanded Operative Stress Score not shown

OSS3 moderate stress, OSS4 high stress and OSS5 very high stress

<sup>d</sup>Complications defined as 30 days from date of the index surgery

EDOS and Readmissions were evaluated independently; membership in one group does not exclude a case from membership in the other

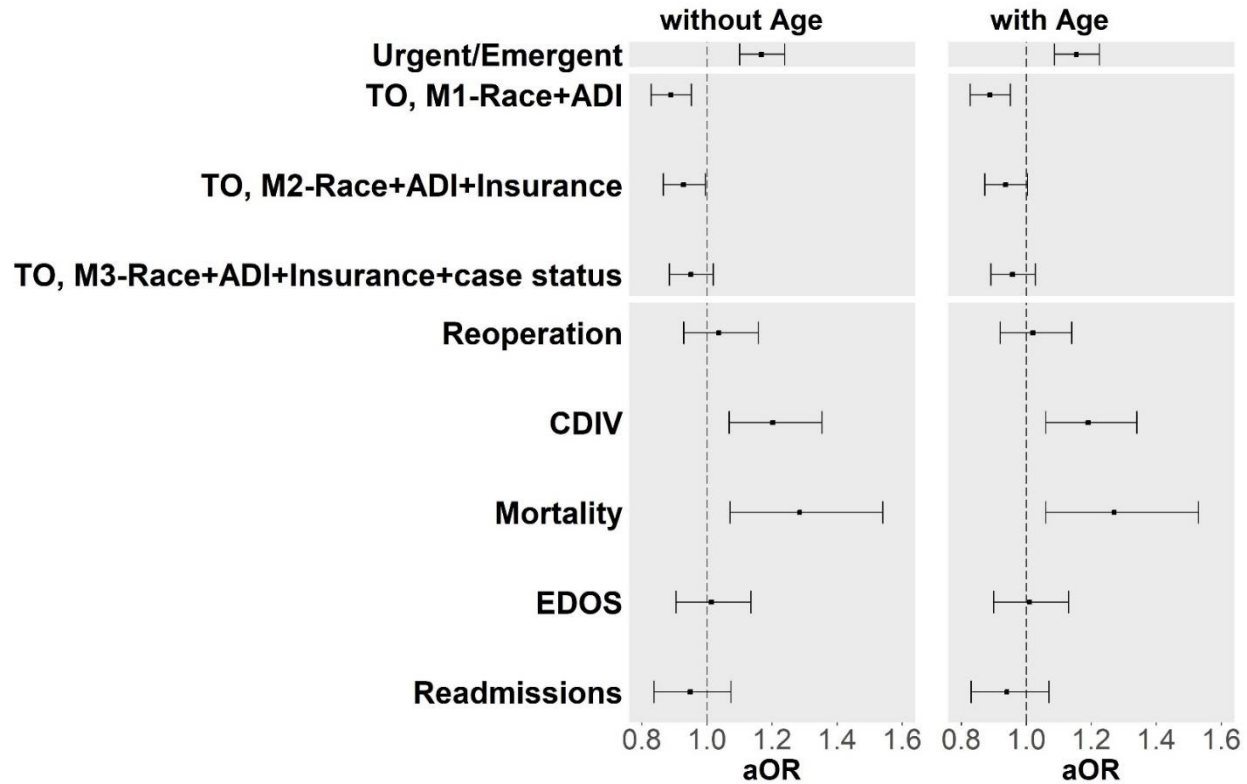

**SDC-Figure 1. Case Status, Textbook Outcomes (TO) and TO Components with a Sensitivity Analysis also Adjusting for Age**

Forest plot of **Tables 2, 3 & 5** (left) with a sensitivity analysis also adjusting for age groups of 18-44 (reference group), 45-64 and  $\geq 65$  years of age (right). TO nested models were adjusted for Risk Analysis Index and expanded Operative Stress Score in addition to the variables listed in models 1-3 (M1-M3).

Urgent/emergent cases (**Table 2**) were adjusted for race/ethnicity Risk Analysis Index/frailty, Area Deprivation Index $>85$  and insurance type.

TO nested models (**Table 3**) were adjusted for Risk Analysis Index and expanded Operative Stress Score in addition to the variables listed in models 1-3 (M1-M3).

TO components (**Table 5**) were adjusted for Risk Analysis Index, expanded Operative Stress Score, race/ethnicity, Insurance Type and urgent/emergent case status (M3 model variables).

Abbreviations: ADI, Area Deprivation Index; aOR, adjusted Odds Ratio; CDIV, Clavien-Dindo IV complications; EDOS, Emergency Department visits/Observation Stays; RAI, Risk Analysis Index
